# Supplementary material for: New Universal Rules of Eukaryotic Translation Initiation Fidelity
Source: PLoS Comput Biol. 2013 Jul 11;9(7):e1003136. doi: 10.1371/journal.pcbi.1003136 (PMC3708879; doi:10.1371/journal.pcbi.1003136)
Supplement: Table S1 — Statistics about the genome of the analyzed organisms. (XLSX) [file pcbi.1003136.s038.xlsx]

## Sheet: UTR Lengths
Organism	Num of reconstructed 5'UTRs	Mean 5'UTR Length	Number of ORFs	Mean ORF Length	Num of reconstructed 3'UTRs	Mean 3'UTR Length
S. cerevisiae	4367	82.33	5861	1490.8	4972	133.62
S. pombe	4693	291.89	5133	1395.5	4748	429.66
H. sapiens	12051	252.05	12183	1437.2	12101	1140.1
C. elegans	10649	72.6	17083	1236.7	12068	197.83
A. thaliana	19728	141.45	19728	1227.6	19106	231.32
A. gossypii	4649	999.87	4683	1473.9	4679	300
A. nidulans	10539	990.3	10539	1466	10536	990.25
C. albicans	5869	999.35	5899	1437.4	5864	998.8
C. dubliniensis	5909	1000	5909	1524	5909	1000
C. glabrata	5203	1000	5203	1522.5	5202	300
C. guilliermondii	5860	999.86	5920	1402.4	5859	998.54
C. lusitaniae	5861	999.64	5926	1389.7	5836	999.52
C. parapsilosis	5843	1000	5843	1511.2	5843	1000
C. tropicalis	6182	998.29	6258	1454.5	6171	997.86
D. hansenii	6272	999.84	6272	1439.9	6272	300
K. lactis	5076	999.95	5076	1456.9	5076	300
K. thermotolerans	5092	999.96	5092	1476.1	5092	300
L. elongosporus	5702	997.68	5775	1533.5	5686	996.97
P. sorbitophila	11175	999.84	11175	1465.9	11175	300
S. bayanus	3653	605.28	3653	1438.7	3632	420.43
S. kluyveri	5320	999.32	5320	1492.8	5320	300
S. mikatae	3376	578.9	3376	1415	3362	379.45
S. paradoxus	4297	612.73	4297	1484.8	4276	418.86
Y. lipolytica	6445	999.88	6448	1463.8	6447	299.98
Z. rouxii	4991	1000	4991	1491.1	4991	299.93
B. Taurus	10508	134.61	15457	1531	10972	605.78
C. intestinalis	12125	129.71	13155	874.14	9978	207.7
D. melangaster	12278	221.35	13831	1537.6	12421	356.63
D. rerio	13972	166.23	21806	1522.8	15600	856.28
G. gallus	6440	123.32	9537	1376.3	6658	514.84
M. musculus	19946	214.49	22026	1395.9	19921	1052.4
P. troglodytes	12586	214.9	16853	1597.2	13009	1055
R. norvegicus	12149	174.38	18716	1389.9	12447	676.6
